# Supplementary material for: Multiple length-scale control of Boc-protected diphenylalanine aggregates through solvent composition
Source: Royal Society of Chemistry journal article supplement (doi:10.1039/d4ma00018h), 2024-01-01
Supplement: d4ma00018h1.pdf [file d4ma00018h1.pdf]

**Table T1**

| synthesized               |        |                      |
|---------------------------|--------|----------------------|
| $q$ ( $\text{\AA}^{-1}$ ) | $I(q)$ | $d$ ( $\text{\AA}$ ) |
| 0.49                      | 461    | 12.81                |
| 0.59                      | 1153   | 10.64                |
| 0.62                      | 3225   | 10.13                |
| 0.64                      | 4635   | 9.81                 |
| 0.88                      | 320    | 7.14                 |
| 0.98                      | 966    | 6.41                 |
| 1.01                      | 593    | 6.22                 |
| 1.06                      | 354    | 5.92                 |
| 1.18                      | 2709   | 5.32                 |
| 1.22                      | 2620   | 5.15                 |
| 1.24                      | 2296   | 5.06                 |
| 1.26                      | 1578   | 4.98                 |
| 1.28                      | 1594   | 4.91                 |
| 1.36                      | 1310   | 4.62                 |
| 1.48                      | 1780   | 4.24                 |
| 1.55                      | 1200   | 4.05                 |
| 1.63                      | 1870   | 3.85                 |
| 1.75                      | 1229   | 3.59                 |
| 1.82                      | 507    | 3.45                 |
| 1.89                      | 566    | 3.32                 |
| 1.95                      | 529    | 3.22                 |
| 2.02                      | 513    | 3.11                 |
| 2.11                      | 514    | 2.98                 |
| 2.23                      | 375    | 2.82                 |
| 2.27                      | 375    | 2.77                 |
| 2.33                      | 385    | 2.70                 |
| 2.46                      | 394    | 2.55                 |
| 2.49                      | 378    | 2.52                 |
| 2.62                      | 488    | 2.40                 |
| 2.68                      | 384    | 2.34                 |

|      |     |      |
|------|-----|------|
| 2.75 | 334 | 2.28 |
| 2.82 | 301 | 2.23 |
| 2.91 | 354 | 2.16 |
| 2.96 | 319 | 2.12 |
| 3.07 | 329 | 2.05 |
| 3.13 | 446 | 2.01 |
| 3.16 | 414 | 1.99 |
| 3.32 | 273 | 1.89 |
| 3.39 | 281 | 1.85 |
| 3.48 | 268 | 1.80 |
| 3.62 | 233 | 1.73 |

**Table T1:** list in sequence of wavevector,  $q$ , and position,  $d$ , of all the observed lines, together with their intensities,  $I(q)$ , of the powder diffraction data of the synthesized sample.

**Table T2**

| AcN 2%                    |        |                      |
|---------------------------|--------|----------------------|
| $q$ ( $\text{\AA}^{-1}$ ) | $I(q)$ | $d$ ( $\text{\AA}$ ) |
| 0.53                      | 509    | 11.85                |
| 0.59                      | 225    | 10.64                |
| 0.61                      | 558    | 10.30                |
| 0.64                      | 824    | 9.81                 |
| 0.74                      | 130    | 8.49                 |
| 0.77                      | 160    | 8.16                 |
| 0.79                      | 126    | 7.95                 |
| 0.90                      | 274    | 6.98                 |
| 0.92                      | 307    | 6.83                 |
| 0.98                      | 321    | 6.41                 |
| 1.13                      | 440    | 5.56                 |
| 1.16                      | 530    | 5.41                 |
| 1.18                      | 557    | 5.32                 |
| 1.22                      | 634    | 5.15                 |
| 1.24                      | 733    | 5.06                 |
| 1.26                      | 616    | 4.98                 |
| 1.28                      | 504    | 4.91                 |
| 1.35                      | 622    | 4.65                 |

|      |     |      |
|------|-----|------|
| 1.37 | 548 | 4.58 |
| 1.48 | 619 | 4.24 |
| 1.56 | 579 | 4.03 |
| 1.59 | 441 | 3.95 |
| 1.63 | 646 | 3.85 |
| 1.74 | 465 | 3.61 |
| 1.83 | 350 | 3.43 |
| 1.91 | 304 | 3.29 |
| 1.98 | 257 | 3.17 |
| 2.04 | 225 | 3.08 |
| 2.10 | 215 | 2.99 |
| 2.20 | 185 | 2.85 |
| 2.33 | 176 | 2.70 |
| 2.45 | 155 | 2.56 |
| 2.62 | 163 | 2.40 |
| 2.68 | 149 | 2.34 |
| 2.75 | 153 | 2.28 |
| 2.90 | 156 | 2.17 |
| 3.04 | 171 | 2.07 |
| 3.12 | 183 | 2.01 |
| 3.22 | 146 | 1.95 |
| 3.32 | 132 | 1.89 |
| 3.38 | 124 | 1.86 |

**Table T2:** list in sequence of wavevector,  $q$ , and position,  $d$ , of all the observed lines, together with their intensities,  $I(q)$ , of the powder diffraction data of the sample prepared in AcN (2%)-H<sub>2</sub>O (98%) mixture.

**Table T3**

| AcN 4%                 |        |         |
|------------------------|--------|---------|
| $q$ (Å <sup>-1</sup> ) | $I(q)$ | $d$ (Å) |
| 0.53                   | 1785   | 11.85   |
| 0.59                   | 1386   | 10.64   |
| 0.61                   | 2971   | 10.30   |
| 0.64                   | 4187   | 9.81    |
| 0.7                    | 756    | 8.97    |

|      |      |      |
|------|------|------|
| 0.74 | 799  | 8.49 |
| 0.77 | 871  | 8.16 |
| 0.79 | 789  | 7.95 |
| 0.86 | 866  | 7.30 |
| 0.9  | 1118 | 6.98 |
| 0.92 | 1191 | 6.83 |
| 0.98 | 1534 | 6.41 |
| 1.18 | 3078 | 5.32 |
| 1.21 | 3156 | 5.19 |
| 1.24 | 3003 | 5.06 |
| 1.28 | 2225 | 4.91 |
| 1.33 | 1598 | 4.72 |
| 1.35 | 2119 | 4.65 |
| 1.37 | 1797 | 4.58 |
| 1.48 | 2196 | 4.24 |
| 1.54 | 1652 | 4.08 |
| 1.56 | 1848 | 4.03 |
| 1.58 | 1342 | 3.97 |
| 1.63 | 2297 | 3.85 |
| 1.74 | 1644 | 3.61 |
| 1.82 | 1130 | 3.45 |
| 1.89 | 1022 | 3.32 |
| 1.91 | 1047 | 3.29 |
| 2.03 | 858  | 3.09 |
| 2.11 | 817  | 2.98 |
| 2.2  | 698  | 2.85 |
| 2.27 | 652  | 2.77 |
| 2.33 | 709  | 2.70 |
| 2.45 | 643  | 2.56 |
| 2.49 | 599  | 2.52 |
| 2.62 | 698  | 2.40 |
| 2.68 | 614  | 2.34 |
| 2.75 | 606  | 2.28 |
| 2.83 | 549  | 2.22 |
| 2.91 | 637  | 2.16 |
| 2.97 | 629  | 2.11 |

|      |     |      |
|------|-----|------|
| 3.05 | 653 | 2.06 |
| 3.13 | 702 | 2.01 |
| 3.22 | 563 | 1.95 |
| 3.32 | 505 | 1.89 |
| 3.38 | 487 | 1.86 |
| 3.48 | 468 | 1.80 |
| 3.62 | 404 | 1.73 |

**Table T3:** list in sequence of wavevector,  $q$ , and position,  $d$ , of all the observed lines, together with their intensities,  $I(q)$ , of the powder diffraction data of the sample prepared in AcN (4%)-H<sub>2</sub>O (96%) mixture.

**Table T4**

| AcN 6%                    |        |                      |
|---------------------------|--------|----------------------|
| $q$ ( $\text{\AA}^{-1}$ ) | $I(q)$ | $d$ ( $\text{\AA}$ ) |
| 0.53                      | 630    | 11.85                |
| 0.59                      | 296    | 10.64                |
| 0.61                      | 879    | 10.30                |
| 0.64                      | 1188   | 9.81                 |
| 0.7                       | 85     | 8.97                 |
| 0.74                      | 121    | 8.49                 |
| 0.77                      | 154    | 8.16                 |
| 0.79                      | 109    | 7.95                 |
| 0.86                      | 117    | 7.30                 |
| 0.9                       | 271    | 6.98                 |
| 0.92                      | 314    | 6.82                 |
| 0.98                      | 355    | 6.41                 |
| 1.16                      | 618    | 5.41                 |
| 1.17                      | 578    | 5.37                 |
| 1.18                      | 735    | 5.32                 |
| 1.21                      | 773    | 5.19                 |
| 1.24                      | 865    | 5.06                 |
| 1.26                      | 663    | 4.98                 |
| 1.28                      | 539    | 4.91                 |
| 1.35                      | 630    | 4.65                 |
| 1.37                      | 526    | 4.58                 |

|      |     |      |
|------|-----|------|
| 1.48 | 655 | 4.24 |
| 1.55 | 556 | 4.05 |
| 1.58 | 399 | 3.97 |
| 1.63 | 707 | 3.85 |
| 1.74 | 469 | 3.61 |
| 1.82 | 318 | 3.45 |
| 1.9  | 286 | 3.31 |
| 1.96 | 223 | 3.20 |
| 1.98 | 238 | 3.17 |
| 2.04 | 214 | 3.08 |
| 2.11 | 213 | 2.98 |
| 2.2  | 184 | 2.85 |
| 2.27 | 158 | 2.77 |
| 2.33 | 185 | 2.70 |
| 2.45 | 161 | 2.56 |
| 2.49 | 141 | 2.52 |
| 2.62 | 174 | 2.40 |
| 2.75 | 147 | 2.28 |
| 2.83 | 114 | 2.22 |
| 2.9  | 142 | 2.17 |
| 2.97 | 121 | 2.11 |
| 3.05 | 144 | 2.06 |
| 3.12 | 167 | 2.01 |
| 3.15 | 154 | 1.99 |
| 3.22 | 128 | 1.95 |
| 3.32 | 120 | 1.89 |
| 3.38 | 116 | 1.86 |
| 3.48 | 116 | 1.80 |
| 3.62 | 104 | 1.73 |

**Table T4:** list in sequence of wavevector,  $q$ , and position,  $d$ , of all the observed lines, together with their intensities,  $I(q)$ , of the powder diffraction data of the sample prepared in AcN (6%)-H<sub>2</sub>O (94%) mixture.

## Table T5

|        |
|--------|
| AcN 8% |
|--------|

| $q$ ( $\text{\AA}^{-1}$ ) | $I(q)$ | $d$ ( $\text{\AA}$ ) |
|---------------------------|--------|----------------------|
| 0.53                      | 425    | 11.85                |
| 0.59                      | 377    | 10.64                |
| 0.61                      | 1037   | 10.30                |
| 0.64                      | 1557   | 9.81                 |
| 0.74                      | 96     | 8.49                 |
| 0.77                      | 127    | 8.16                 |
| 0.79                      | 98     | 7.95                 |
| 0.90                      | 227    | 6.98                 |
| 0.92                      | 269    | 6.83                 |
| 0.98                      | 446    | 6.41                 |
| 1.16                      | 716    | 5.41                 |
| 1.18                      | 1013   | 5.32                 |
| 1.21                      | 1028   | 5.19                 |
| 1.24                      | 986    | 5.06                 |
| 1.26                      | 798    | 4.98                 |
| 1.28                      | 671    | 4.91                 |
| 1.33                      | 481    | 4.72                 |
| 1.35                      | 705    | 4.65                 |
| 1.37                      | 573    | 4.58                 |
| 1.48                      | 773    | 4.24                 |
| 1.54                      | 537    | 4.08                 |
| 1.56                      | 624    | 4.03                 |
| 1.58                      | 400    | 3.97                 |
| 1.63                      | 829    | 3.85                 |
| 1.74                      | 553    | 3.61                 |
| 1.82                      | 316    | 3.45                 |
| 1.89                      | 304    | 3.32                 |
| 1.91                      | 303    | 3.29                 |
| 1.94                      | 254    | 3.24                 |
| 1.96                      | 259    | 3.20                 |
| 1.98                      | 257    | 3.17                 |
| 2.04                      | 239    | 3.08                 |
| 2.12                      | 239    | 2.96                 |
| 2.2                       | 185    | 2.85                 |
| 2.27                      | 167    | 2.77                 |

|      |     |      |
|------|-----|------|
| 2.33 | 191 | 2.70 |
| 2.45 | 183 | 2.56 |
| 2.49 | 163 | 2.52 |
| 2.62 | 214 | 2.40 |
| 2.68 | 175 | 2.34 |
| 2.75 | 170 | 2.28 |
| 2.83 | 141 | 2.22 |
| 2.9  | 176 | 2.17 |
| 2.97 | 182 | 2.11 |
| 3.05 | 178 | 2.06 |
| 3.12 | 213 | 2.01 |
| 3.22 | 155 | 1.95 |
| 3.32 | 137 | 1.89 |
| 3.38 | 134 | 1.86 |
| 3.48 | 131 | 1.80 |
| 3.61 | 115 | 1.74 |

**Table T5:** list in sequence of wavevector,  $q$ , and position,  $d$ , of all the observed lines, together with their intensities,  $I(q)$ , of the powder diffraction data of the sample prepared in AcN (8%)-H<sub>2</sub>O (92%) mixture.

**Table T6**

| AcN 10%                   |        |                      |
|---------------------------|--------|----------------------|
| $q$ ( $\text{\AA}^{-1}$ ) | $I(q)$ | $d$ ( $\text{\AA}$ ) |
| 0.48                      | 145    | 13.08                |
| 0.50                      | 195    | 12.56                |
| 0.52                      | 214    | 12.08                |
| 0.57                      | 228    | 11.02                |
| 0.59                      | 293    | 10.64                |
| 0.61                      | 764    | 10.30                |
| 0.64                      | 1080   | 9.81                 |
| 0.74                      | 126    | 8.49                 |
| 0.77                      | 137    | 8.16                 |
| 0.79                      | 132    | 7.95                 |
| 0.84                      | 153    | 7.48                 |
| 0.90                      | 190    | 6.98                 |



|      |     |      |
|------|-----|------|
| 0.92 | 198 | 6.83 |
| 0.98 | 352 | 6.41 |
| 1.00 | 274 | 6.28 |
| 1.05 | 212 | 5.98 |
| 1.07 | 214 | 5.87 |
| 1.14 | 409 | 5.51 |
| 1.18 | 727 | 5.32 |
| 1.22 | 747 | 5.15 |
| 1.24 | 709 | 5.06 |
| 1.26 | 584 | 4.98 |
| 1.28 | 599 | 4.91 |
| 1.33 | 436 | 4.72 |
| 1.35 | 561 | 4.65 |
| 1.37 | 514 | 4.58 |
| 1.48 | 651 | 4.24 |
| 1.54 | 511 | 4.08 |
| 1.55 | 538 | 4.05 |
| 1.63 | 658 | 3.85 |
| 1.64 | 620 | 3.83 |
| 1.74 | 491 | 3.61 |
| 1.82 | 319 | 3.45 |
| 1.89 | 310 | 3.32 |
| 1.91 | 294 | 3.29 |
| 1.94 | 281 | 3.24 |
| 1.98 | 253 | 3.17 |
| 2.03 | 233 | 3.09 |
| 2.12 | 219 | 2.96 |
| 2.20 | 176 | 2.85 |
| 2.27 | 165 | 2.77 |
| 2.33 | 167 | 2.70 |
| 2.45 | 155 | 2.56 |
| 2.49 | 149 | 2.52 |
| 2.54 | 139 | 2.47 |
| 2.62 | 179 | 2.40 |
| 2.68 | 154 | 2.34 |
| 2.75 | 152 | 2.28 |

|      |     |      |
|------|-----|------|
| 2.83 | 145 | 2.22 |
| 2.91 | 164 | 2.16 |
| 2.97 | 165 | 2.11 |
| 3.06 | 172 | 2.05 |
| 3.12 | 190 | 2.01 |
| 3.23 | 150 | 1.94 |
| 3.32 | 136 | 1.89 |
| 3.38 | 131 | 1.86 |
| 3.48 | 124 | 1.80 |
| 3.62 | 112 | 1.73 |

**Table T6:** list in sequence of wavevector,  $q$ , and position,  $d$ , of all the observed lines, together with their intensities,  $I(q)$ , of the powder diffraction data of the sample prepared in AcN (10%)-H<sub>2</sub>O (90%) mixture.

**Figure S1**

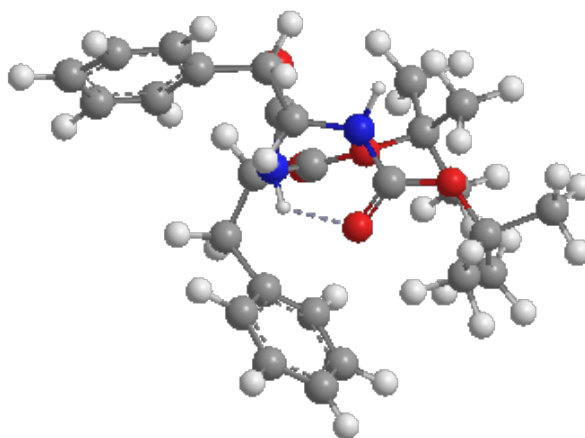

**Figure S1:** Ball-and stick model of Boc-FF molecule.

## Figure S2

AcN(2%)-H<sub>2</sub>O(98%)

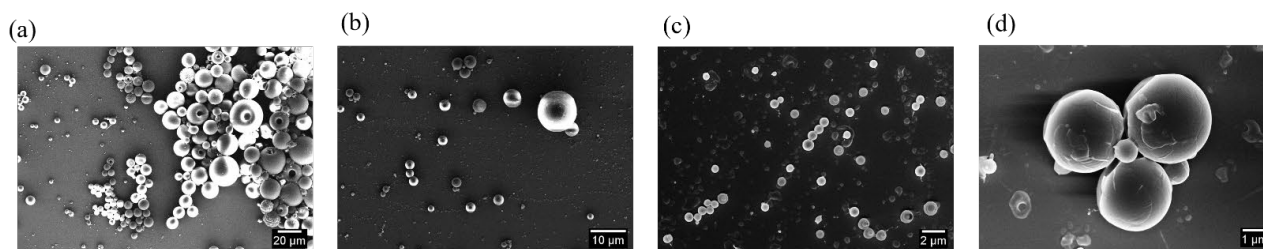

AcN(4%)-H<sub>2</sub>O(96%)

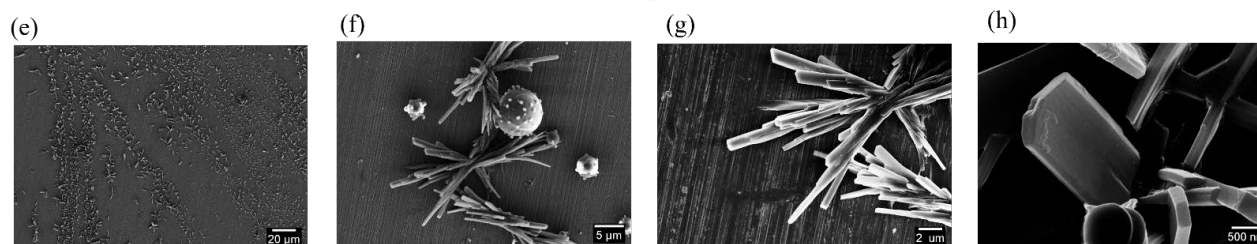

AcN(6%)-H<sub>2</sub>O(94%)

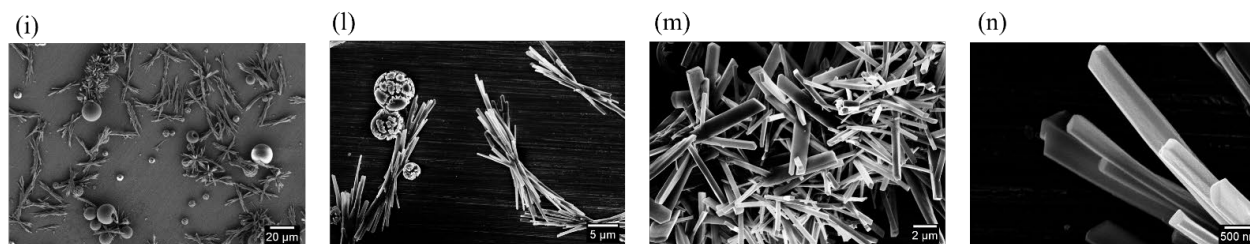

AcN(8%)-H<sub>2</sub>O(92%)

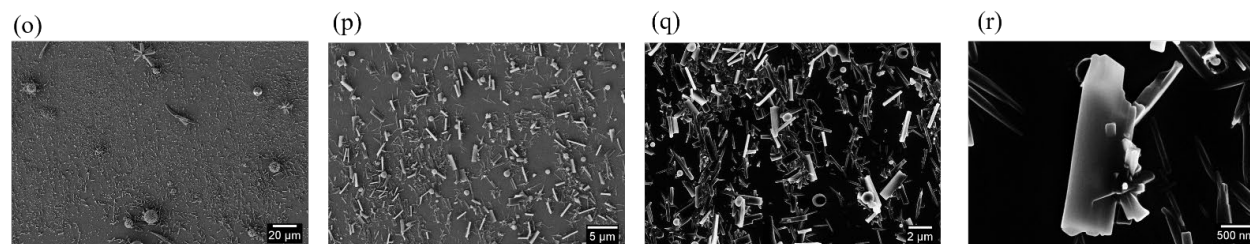

AcN(10%)-H<sub>2</sub>O(90%)

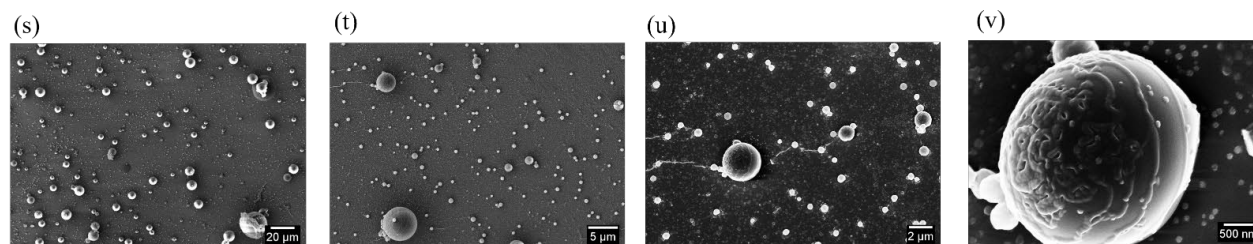

**Figure S2:** SEM images of Boc-FF 1.1mM aggregates formed from the colloidal suspensions at 25°C in the different solvent mixtures at different magnifications (1k, 5k, 10k and 50k).

## Figure S3

AcN(2%)-H<sub>2</sub>O(98%)

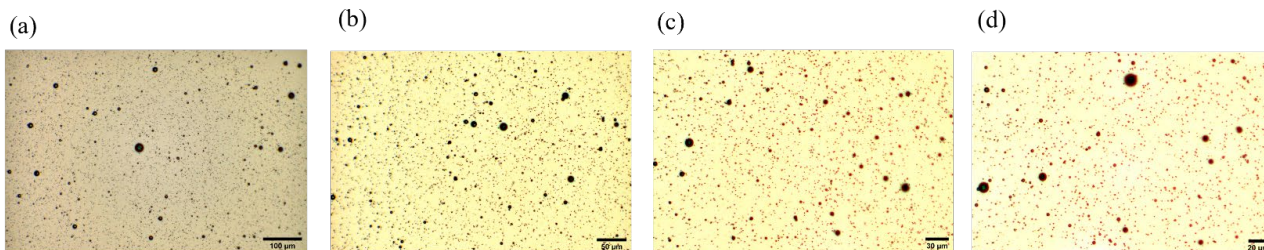

AcN(4%)-H<sub>2</sub>O(96%)

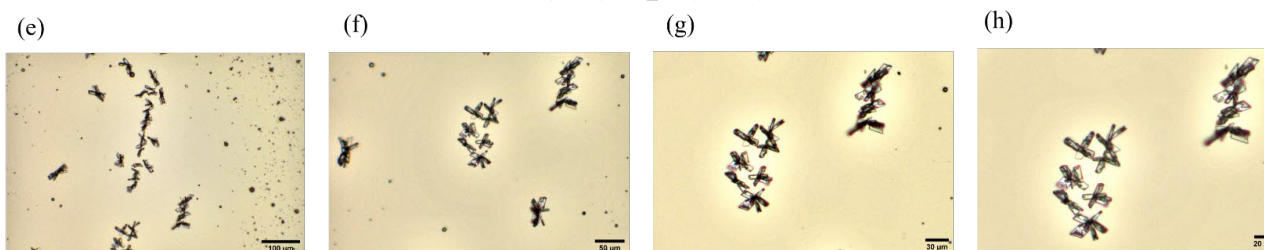

AcN(6%)-H<sub>2</sub>O(94%)

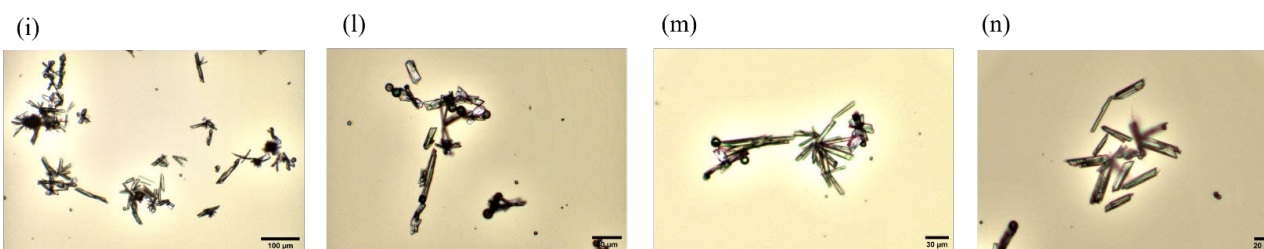

AcN(8%)-H<sub>2</sub>O(92%)

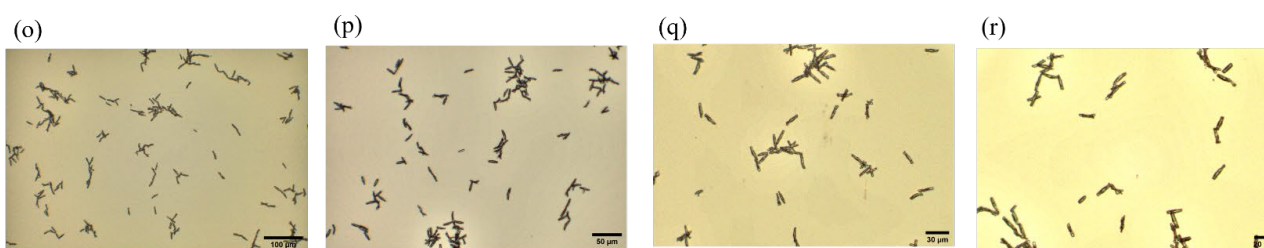

AcN(10%)-H<sub>2</sub>O(90%)

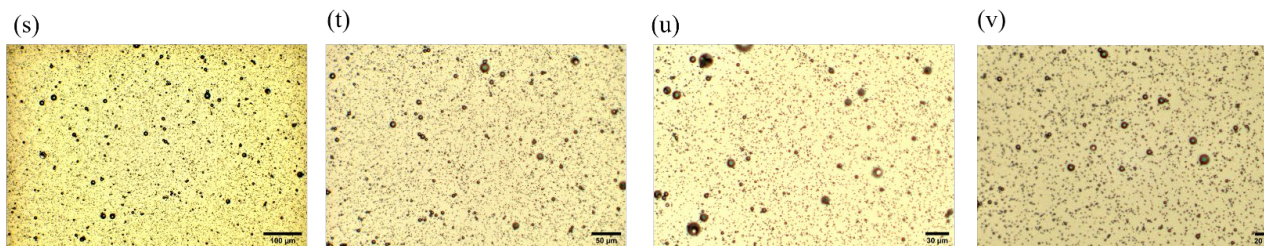

**Figure S3:** OM images of Boc-FF 1.1mM aggregates formed from the colloidal suspensions at 25°C in the different solvent mixtures at different magnifications (400, 600, 800 and 1k).

**Figure S4**

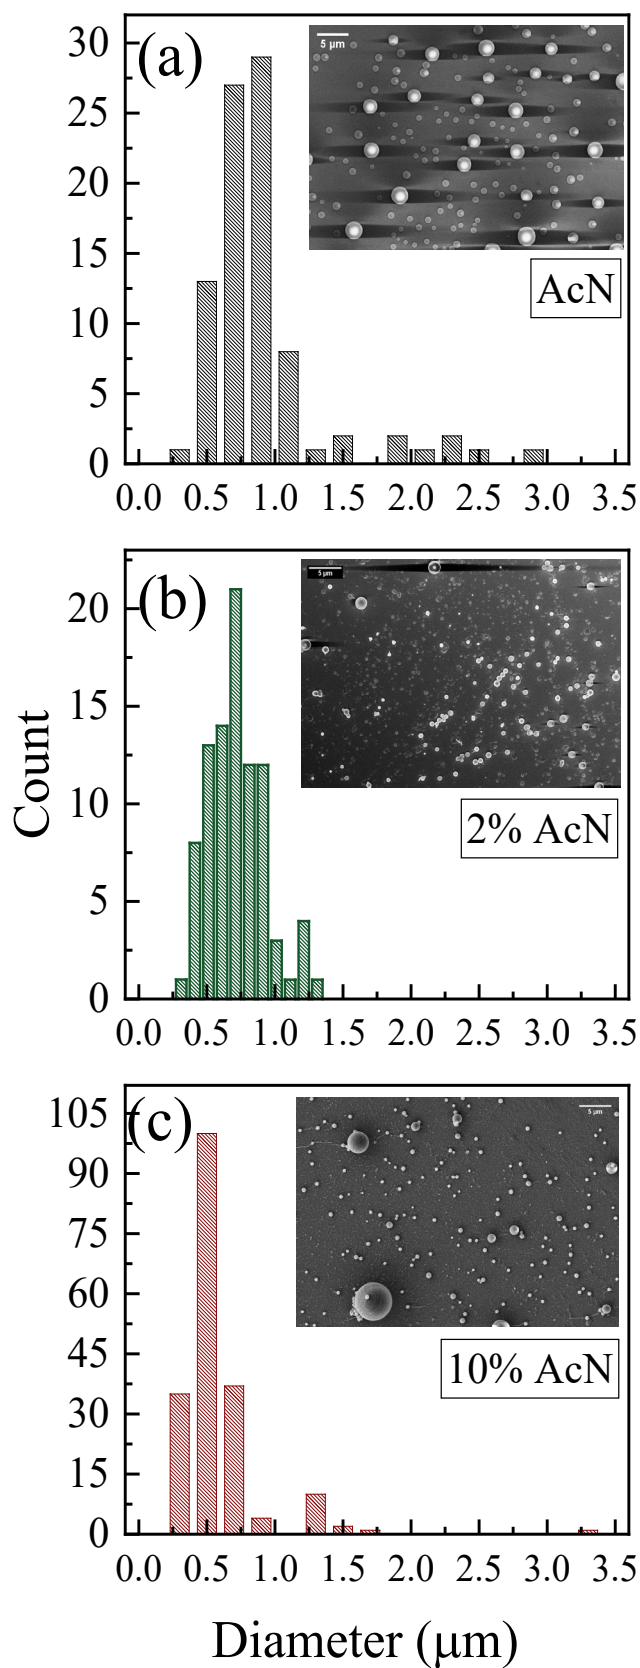

**Figure S4:** dimensional distribution of Boc-FF dry powders of the AcN solution (a) and of the colloidal suspensions in 2% (b) and 10% (c) AcN mixtures. Inserts show the SEM image acquired using 5 k magnification, that have been used to calculate the dimensional distributions.

**Figure S5**

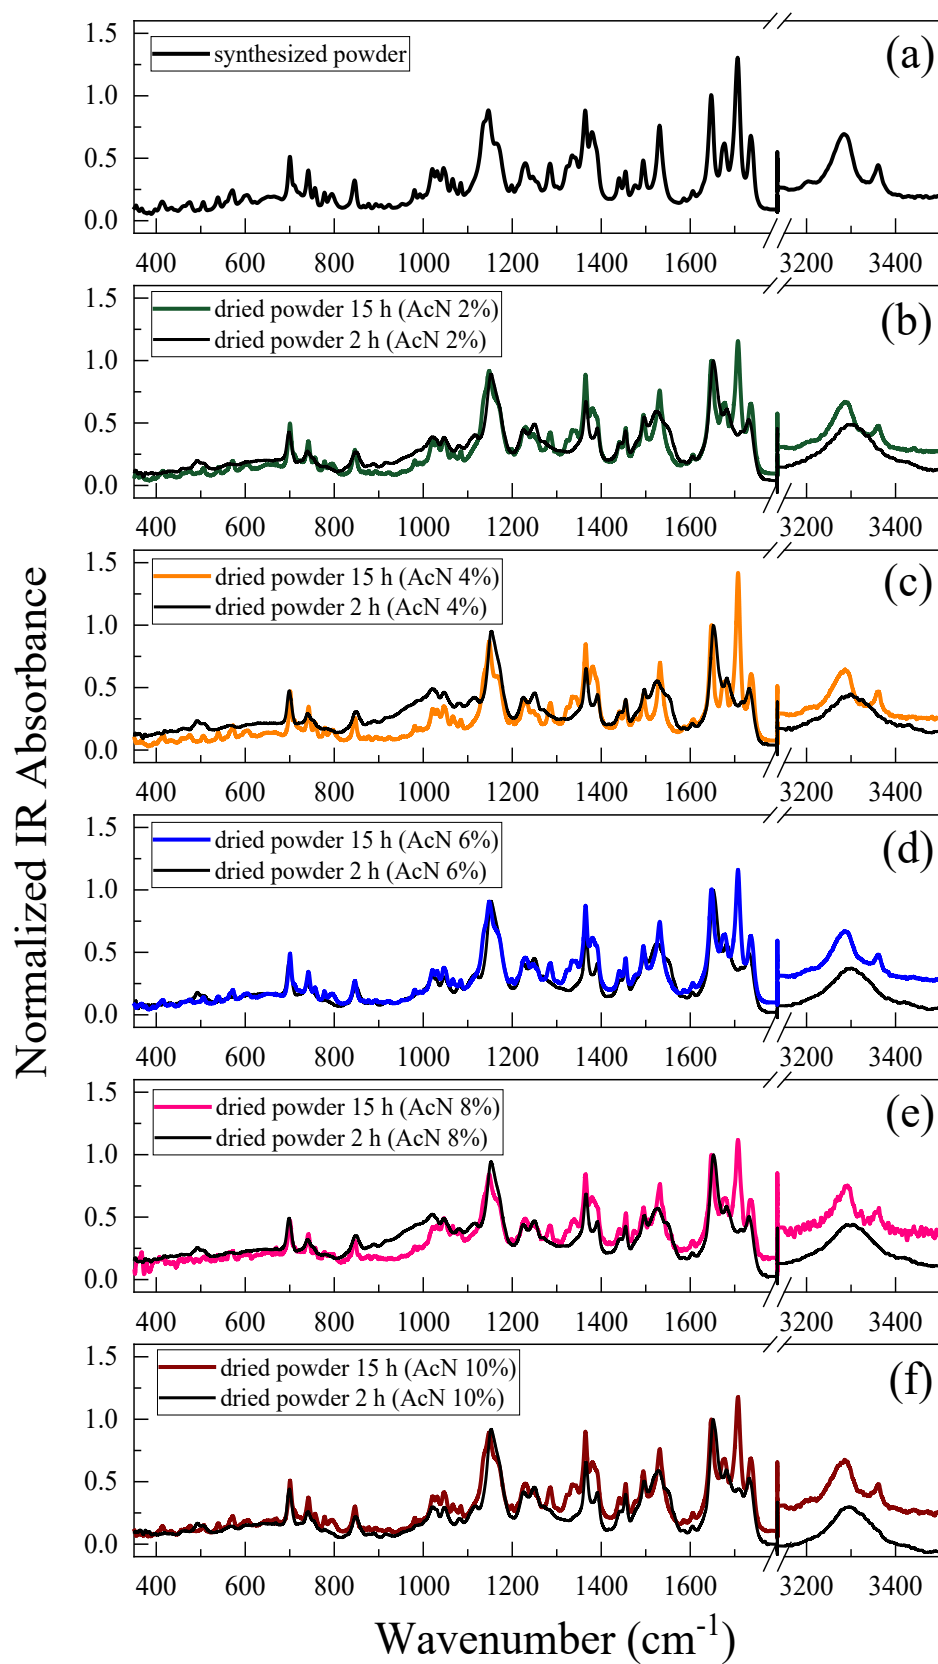

**Figure S5:** FTIR spectra of Boc-FF synthesized powder (a) and powders formed from the colloidal suspensions (b-f) that are dried for 15 h (coloured lines) and 2 h (black lines), recorded in ATR configuration.

**Figure S6**

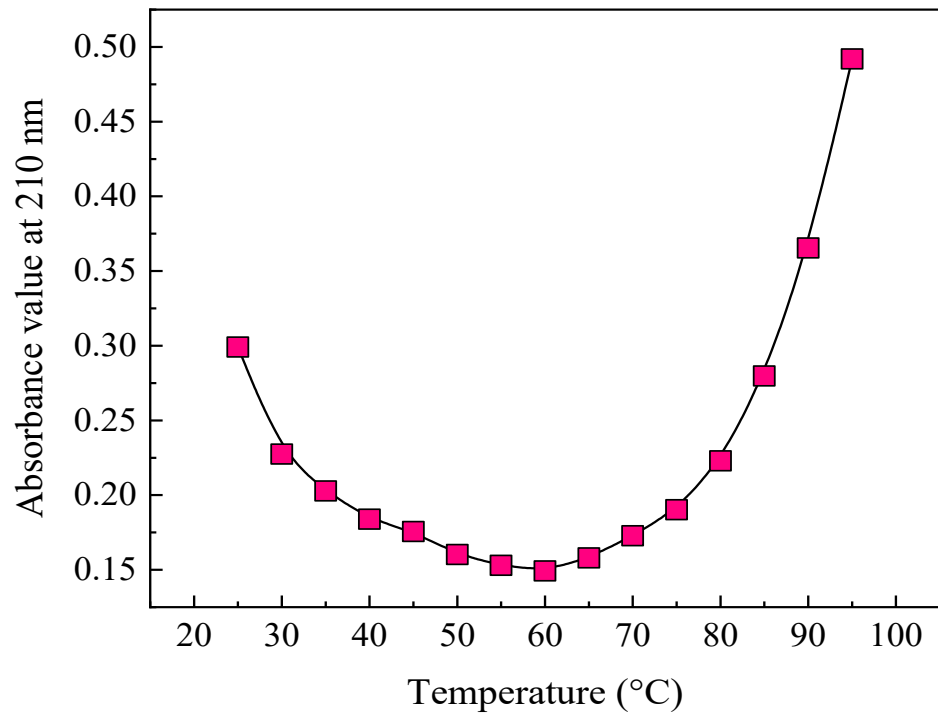

**Figure S6:** UV-Vis absorption values at 210 nm, of 4% AcN Boc-FF colloidal suspension reported as a function of temperature

## Figure S7

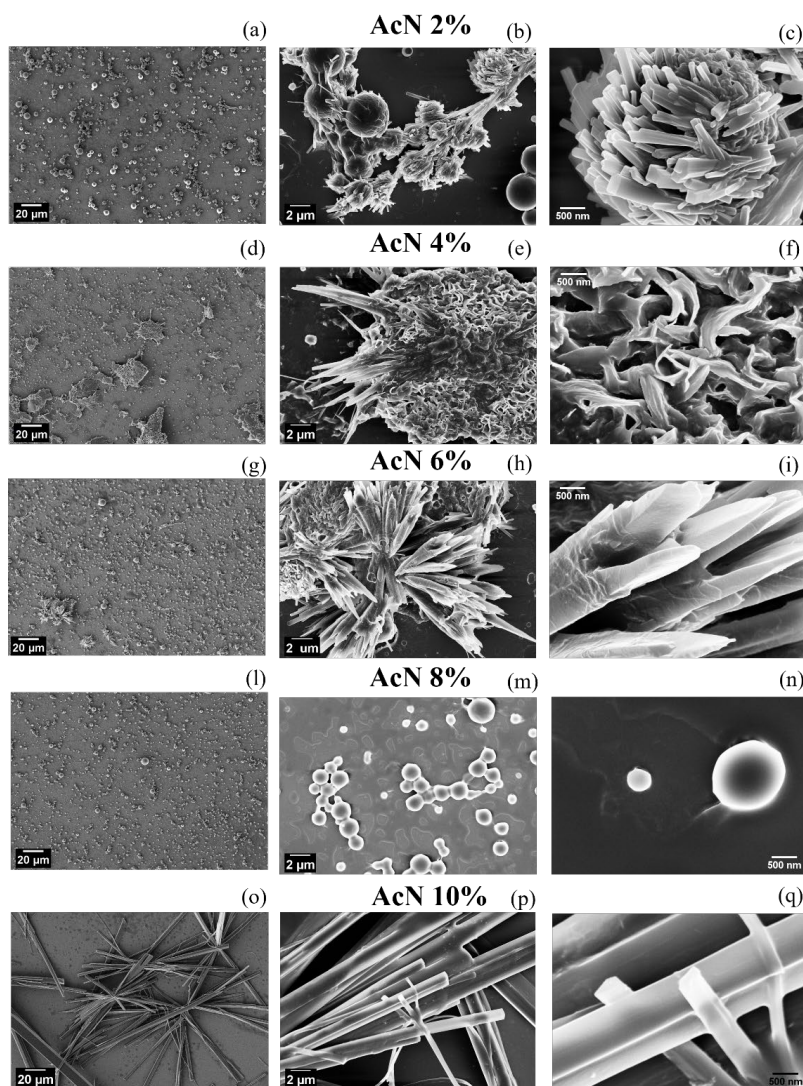

**Figure S7:** SEM images of Boc-FF 1.1mM aggregates formed at 85°C in the different solvent mixtures. Images are acquired with 1 k magnification (a, d, g, l, o) the scale bar is 20 μm, with 10 k magnification (b, e, h, m, p) the scale bar is 20 μm and with 50 k magnification (c, f, i, n, q) the scale bar is 500 nm.



**Figure S8**

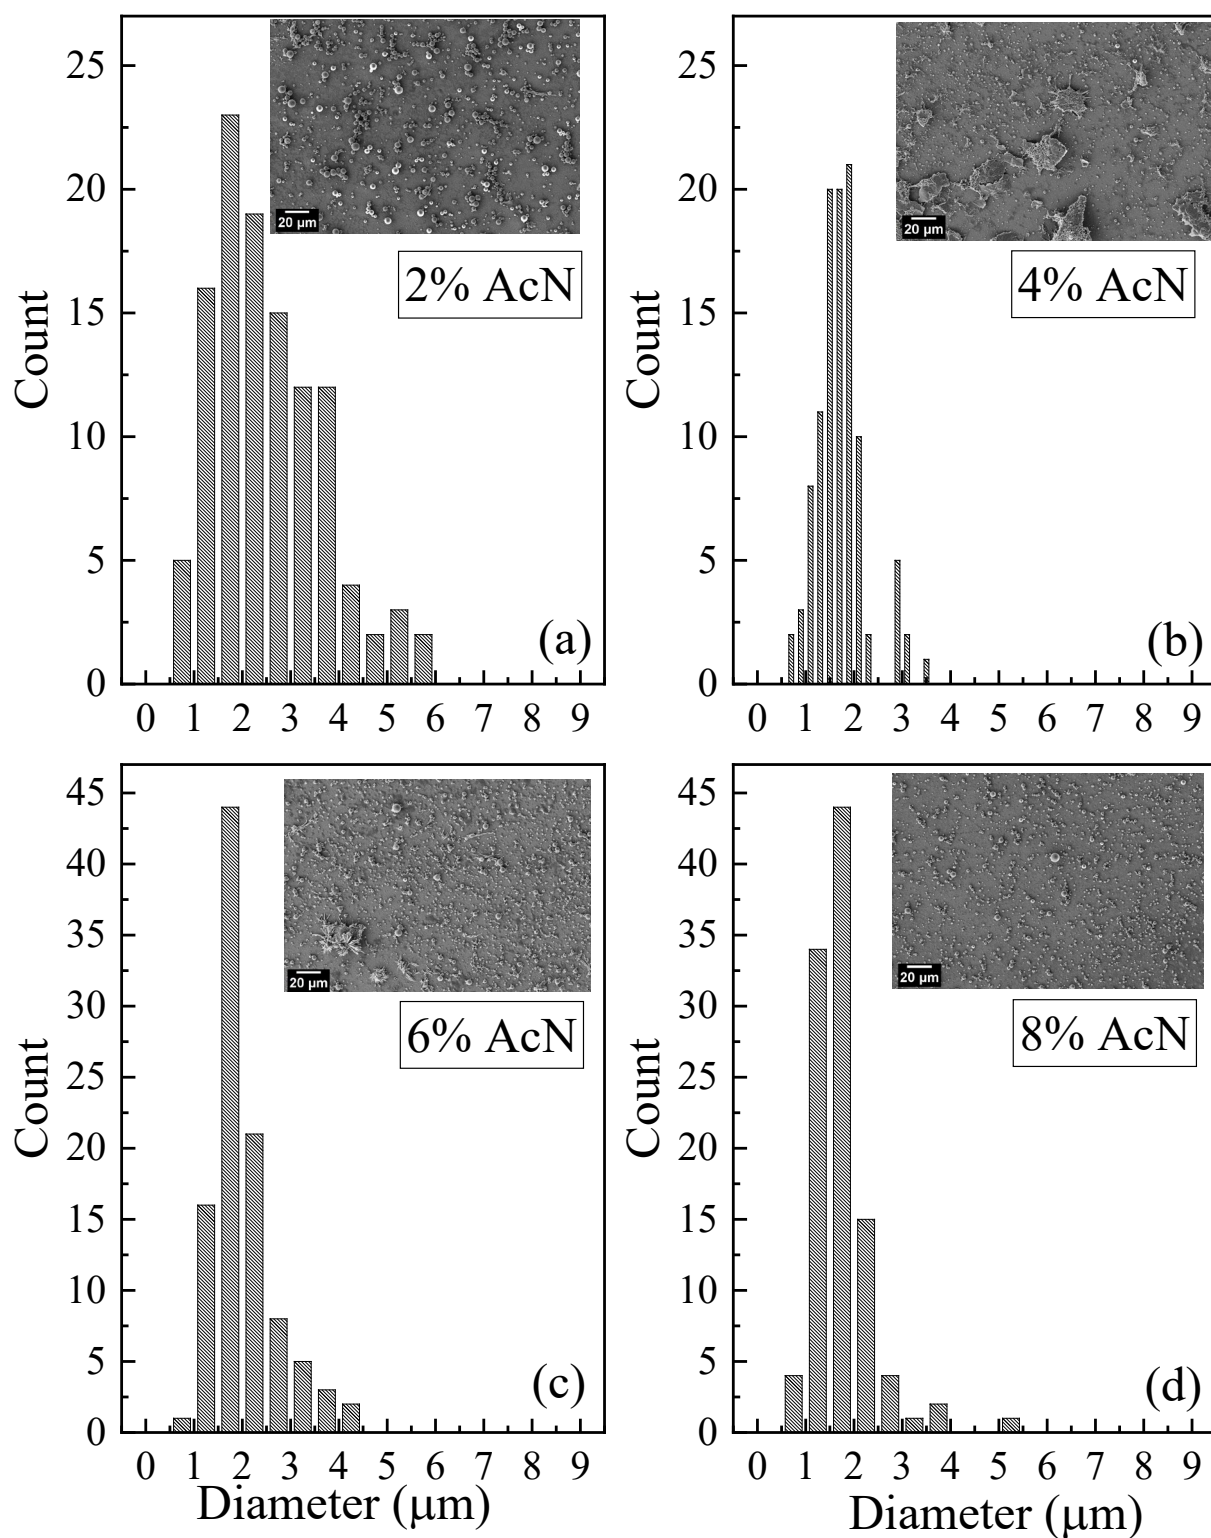

**Figure S8:** dimensional distribution of Boc-FF aggregates in 2% (a), 4% (b), 6% (c) and 8% (d) AcN mixtures. Inserts show the SEM image acquired using 1 k magnification, that have been used to calculate the dimensional distributions.

# Figure S9

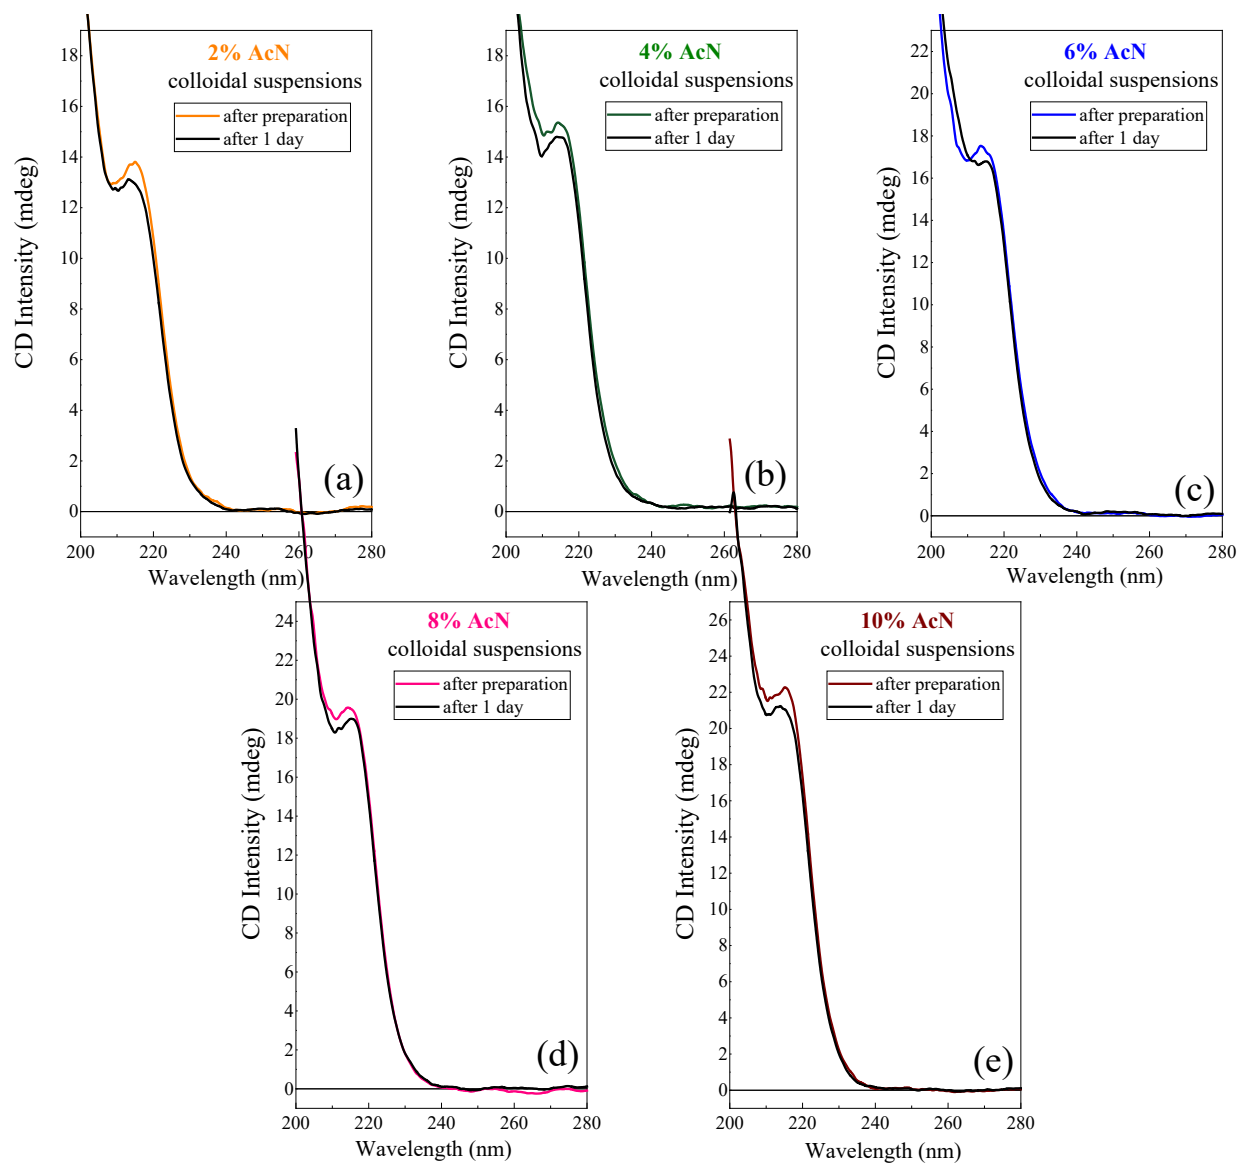

**Figure S9:** comparison of the CD spectra recorded at 25°C, of the colloidal suspensions prepared directly at 85°C immediately after the cooling down (coloured curves) and the day after (black curves).

# Figure S10

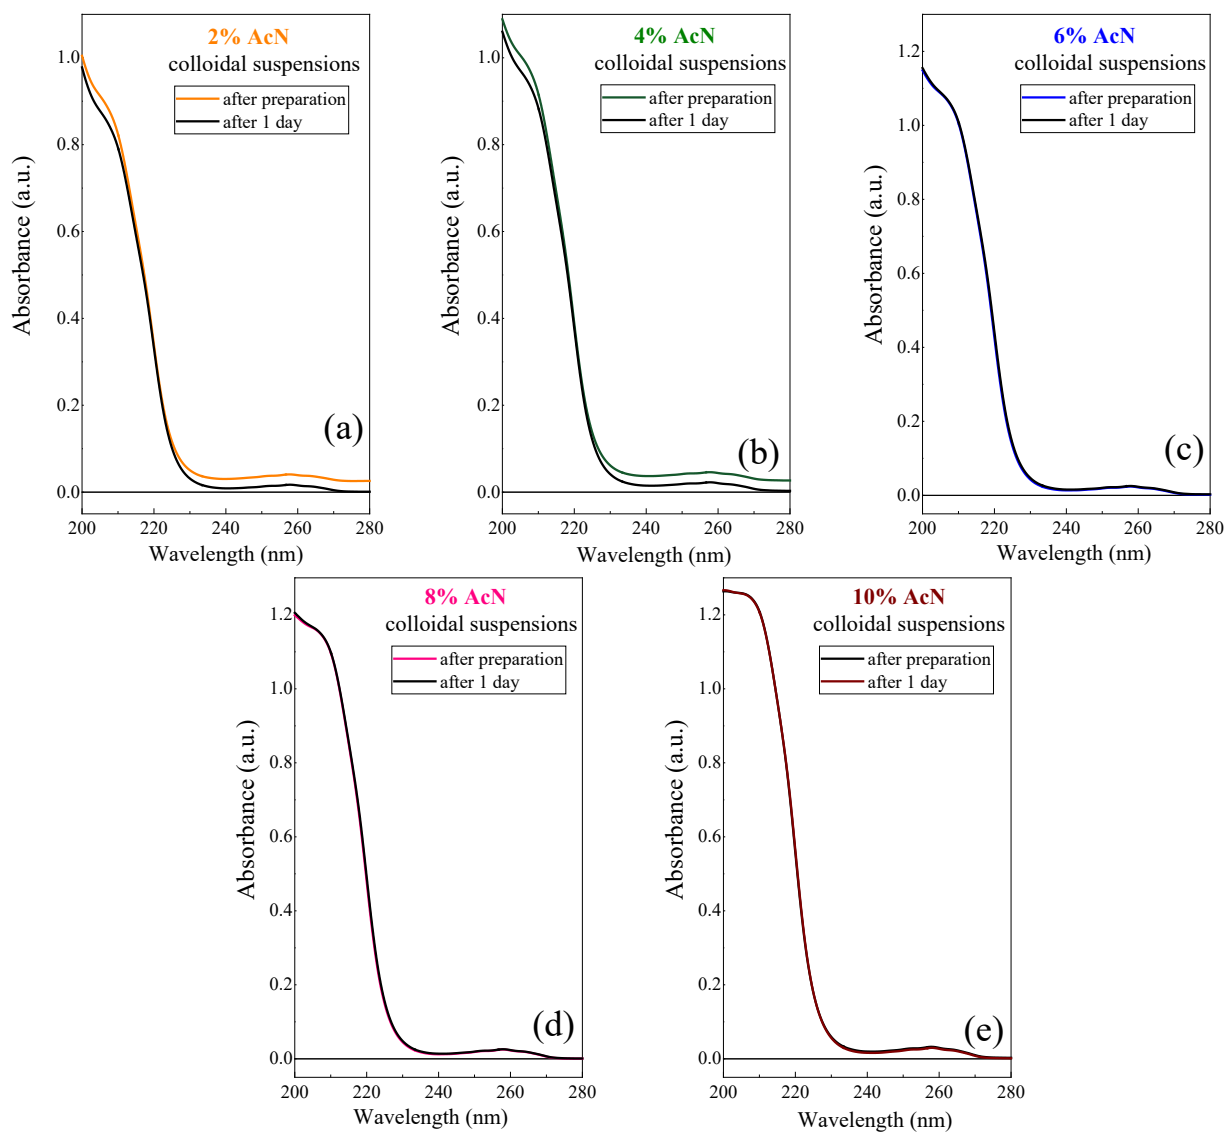

**Figure S10:** comparison of the UV-Vis spectra recorded at 25°C, of the colloidal suspensions prepared directly at 85°C immediately after the cooling down (coloured curves) and the day after (black curves).

**Figure S11**

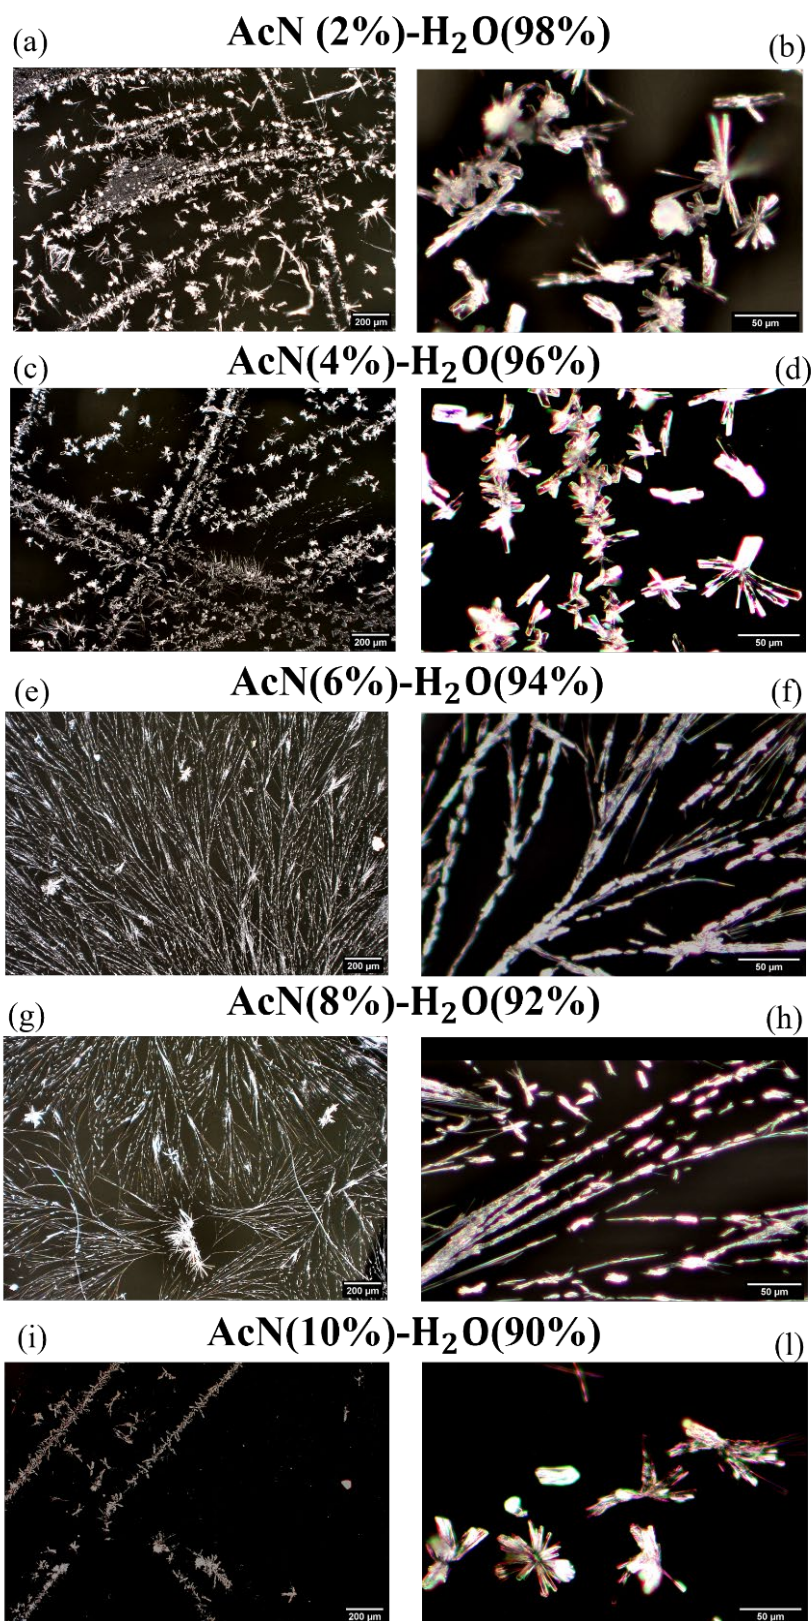

**Figure S11:** OM images of Boc-FF 1.1mM aggregates formed from the colloidal suspensions at 25°C in the different solvent mixtures, after a long evaporation time. Microscopy images are acquired with 140 magnification (a, c, e, g, i) the scale bar is 200  $\mu\text{m}$  and with 1000 magnification (b, d, f, h, l) the scale bar is 50  $\mu\text{m}$

## Figure S12

AcN(2%)-H<sub>2</sub>O(98%)

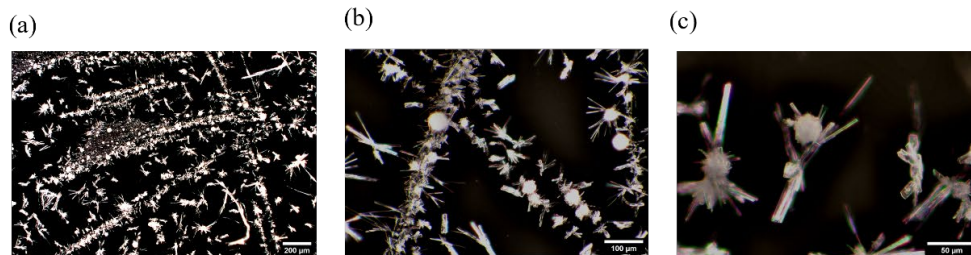

AcN(4%)-H<sub>2</sub>O(96%)

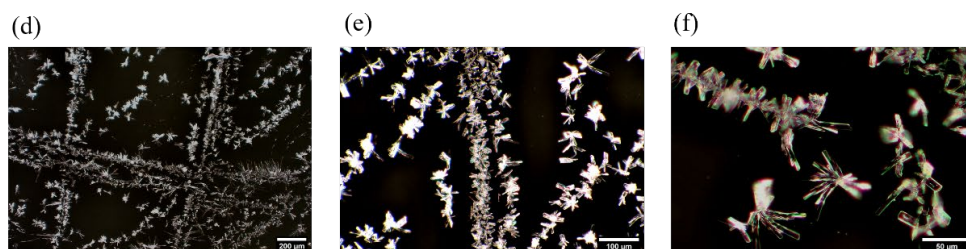

AcN(6%)-H<sub>2</sub>O(94%)

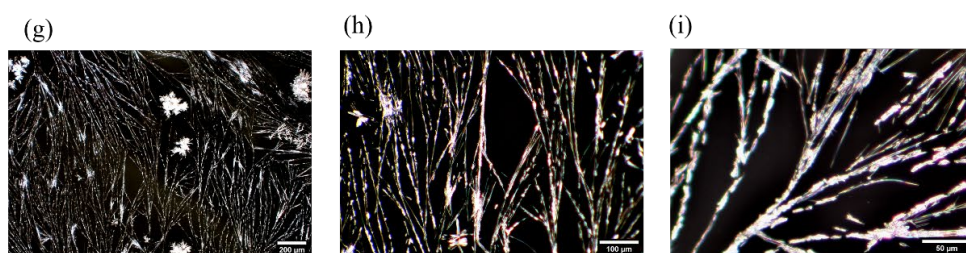

AcN(8%)-H<sub>2</sub>O(92%)

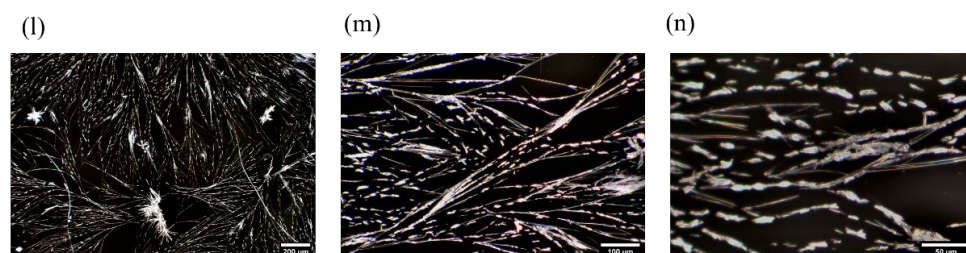

AcN(10%)-H<sub>2</sub>O(90%)

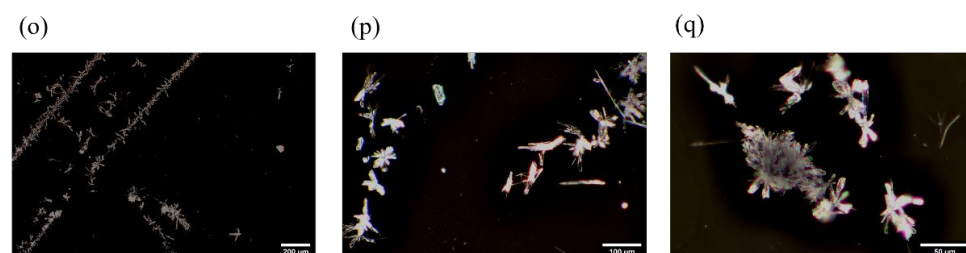

**Figure S12:** OM images of Boc-FF 1.1mM aggregates formed from the colloidal suspensions at 25°C in the different solvent mixtures, after a long evaporation time. Microscopy images are acquired with 140, 800 and 1k magnification.
